# Supplementary material for: Subunit exchange enhances information retention by CaMKII in dendritic spines
Source: eLife journal article supplement (doi:10.7554/elife.41412), 2018-11-12

**A**

$$D_{sub}=0\ \mu\text{m}^2\text{s}^{-1}$$

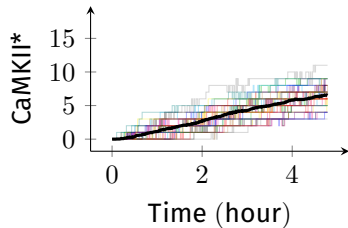**B**

$$D_{sub}=10^{-8}\ \mu\text{m}^2\text{s}^{-1}$$

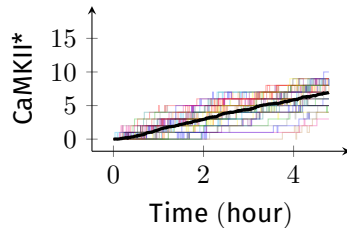**C**

$$D_{sub}=10^{-6}\ \mu\text{m}^2\text{s}^{-1}$$

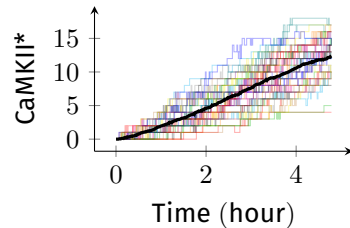**D**

$$D_{sub}=0.001\ \mu\text{m}^2\text{s}^{-1}$$

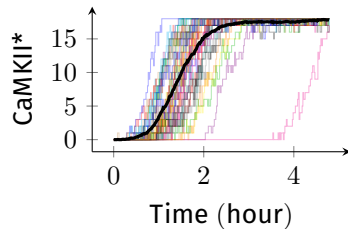**E**

$$D_{sub}=0.01\ \mu\text{m}^2\text{s}^{-1}$$

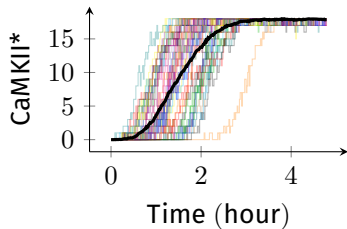**F**

$$D_{sub}=0.1\ \mu\text{m}^2\text{s}^{-1}$$

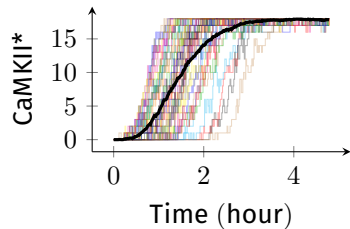

Supplement: supp [file elife-41412-supp-v1.zip]
