# Supplementary figures and images for: Subunit exchange enhances information retention by CaMKII in dendritic spines
Source: eLife journal article supplement (doi:10.7554/elife.41412), 2018-11-12

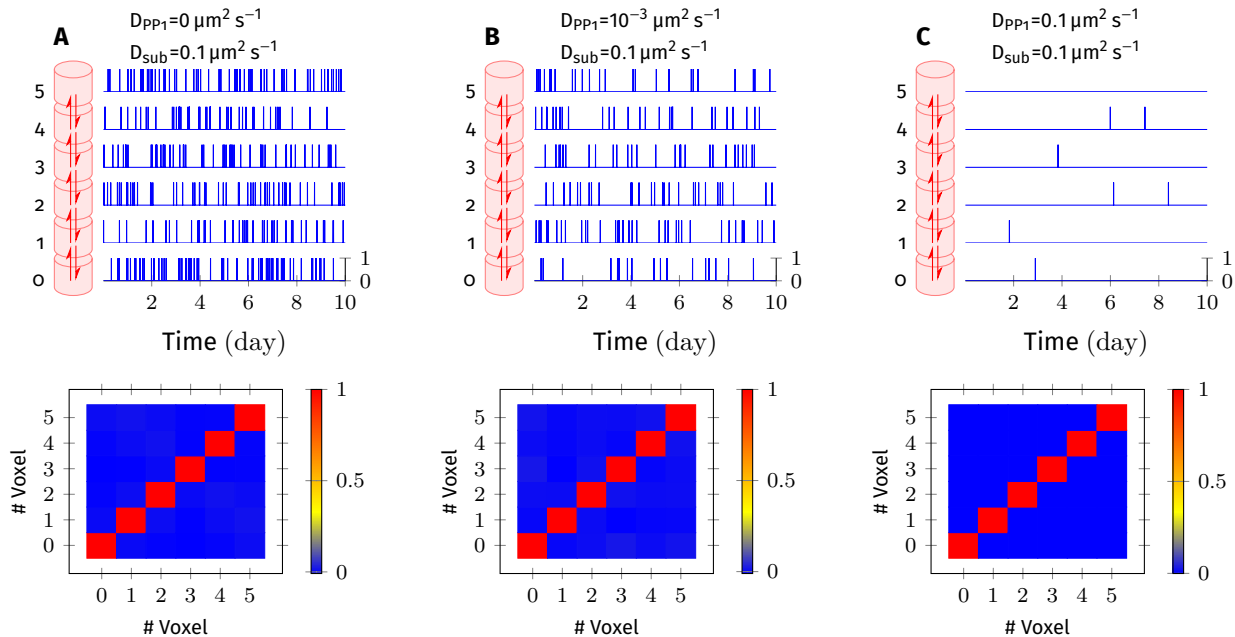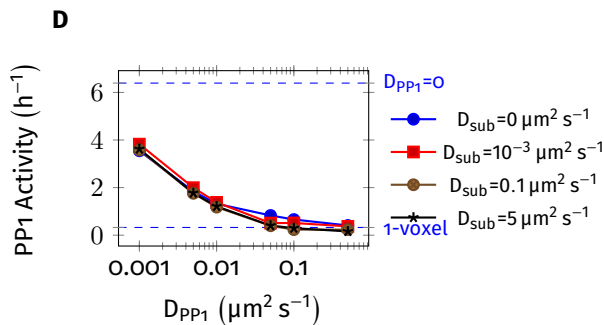

Supplement: supp [file elife-41412-supp-v1.zip]
